# Supplementary material for: Identification of Oocyst-Driven Toxoplasma gondii Infections in Humans and Animals through Stage-Specific Serology—Current Status and Future Perspectives
Source: MDPI journal article supplement (doi:10.3390/microorganisms9112346), 2021-11-13
Supplement: s1 [file s1]

**Table S1.** IgM and IgG avidity tests employed in livestock\*

|                      | Assay format<br>(Antigen employed)                  | Ref. test                | Pig sera   |                        |        |                  |                                                    |                            | Results |                                                       |                                                                                       | Ref. |
|----------------------|-----------------------------------------------------|--------------------------|------------|------------------------|--------|------------------|----------------------------------------------------|----------------------------|---------|-------------------------------------------------------|---------------------------------------------------------------------------------------|------|
|                      |                                                     |                          | (N/E)      | Host-dependent factors |        |                  |                                                    | Parasite-dependent factors |         |                                                       |                                                                                       |      |
|                      |                                                     |                          |            | Nº                     | Age    | Pig**            | Samplings                                          | <i>T. gondii</i> strain    | Stage   | Dose                                                  |                                                                                       |      |
| <b>IgM tests</b>     | Indirect and reverse<br>ELISA (whole TZ<br>extract) | TZ and<br>SAG1<br>ELISAs | E          | 6                      | 8 w    | SPF              | 0-133 dpi                                          | RH                         | TZ      | 10 <sup>6</sup>                                       | All groups:                                                                           | [1]  |
|                      |                                                     |                          | E          | 6                      | 8 w    | SPF              | 0-133 dpi                                          | SSI119                     | TZ      | na                                                    | - IgG seroconversion: 1–2 wpi                                                         |      |
|                      |                                                     |                          | E          | 9                      | na     | na               | 0-98 dpi                                           | SSI 119                    | Oo      | 10 <sup>3</sup>                                       | - IgG levels stabilized: 3–6 wpi                                                      |      |
|                      |                                                     |                          | E          | 10                     | na     | na               | 0-98 dpi                                           | SSI 119                    | Oo      | 10 <sup>4</sup>                                       | - IgG persisted throughout the study period                                           |      |
|                      |                                                     |                          | E          | 10                     | na     | SPF              | 0-98 dpi                                           | SSI 119                    | TC      | na                                                    | - IgM appeared at 7dpi                                                                |      |
|                      |                                                     |                          | E          | 10                     | na     | SPF              | 0-98 dpi                                           | R92                        | TC      | na                                                    | - IgM peaked at 10 dpi and lived up to 21-24 dpi                                      |      |
| <b>Avidity tests</b> | ELISA<br>(whole TZ extract)                         | TZ ELISA                 | E          | 1                      | Piglet | Duroc            | 0-140 dpi                                          | RH                         | TZ      | 10 <sup>7</sup>                                       | High avidity values: 75–100 dpi                                                       | [2]  |
|                      | ELISA<br>(whole TZ extract)                         | TZ ELISA                 | E          | 5                      | Sows   | na               | –1 - 12 wpi                                        | CZ clone H3                | Oo      | 10 <sup>4</sup>                                       | All groups regardless the term of gestation:                                          | [3]  |
|                      |                                                     |                          | E          | 3                      | Sows   | na               | –1 - 12 wpi                                        | CZ clone H3                | Oo      | 10 <sup>4</sup>                                       | IgG seroconversion: 2-3 wpi                                                           |      |
|                      |                                                     |                          | E          | 3+2                    | Sows   | na               | –1 -12 wpi<br>and –1 - 16<br>post-<br>insemination | CZ clone H3                | Oo      | 10 <sup>4</sup> +<br>10 <sup>5</sup> /10 <sup>5</sup> | High avidity values: 8 wpi onwards<br>One piglet with low avidity values until 11 wpi |      |
|                      |                                                     |                          | E          | 3                      | Piglet | na               | 0-11 wpi                                           | CZ Tiger                   | Oo      | 5x10 <sup>3</sup>                                     |                                                                                       |      |
|                      | Assay format<br>(Antigen employed)                  | Reference test           | Sheep sera |                        |        |                  |                                                    |                            | Results |                                                       |                                                                                       | Ref. |
|                      |                                                     |                          | (N/E)      | Host-dependent factors |        |                  |                                                    | Parasite-dependent factors |         |                                                       |                                                                                       |      |
|                      |                                                     |                          |            | Nº                     | Age    | Sheep*           | Samplings                                          | <i>T. gondii</i> strain    | Stage   | Dose                                                  |                                                                                       |      |
| <b>IgM tests</b>     | IFAT (TZ)                                           | ELISA/ WB                | E          | 5                      | 8 m    | Swedish Landrace | 1-5 wpi                                            | M3                         | Oo      | 2000                                                  | IgM: increased at 2 wpi, peaked at 3 wpi and decreased at 4 and 5 wpi                 | [4]  |
| <b>Avidity tests</b> | ELISA (SAG1)                                        | TZ ELISA                 | E          | 6                      | Ewes   | na               | 0-12 wpi                                           | M3                         | Oo      | 2000                                                  | High avidity values: 10 wpi onwards                                                   | [5]  |
|                      |                                                     |                          | N          | 41                     | Ewes   | na               | At slaughter                                       | -                          | -       | -                                                     | High avidity values: 90% and 80%, respectively                                        |      |
|                      |                                                     |                          | N          | and                    | and    | na               | At slaughter                                       | -                          | -       | -                                                     | High avidity values: 97.4%                                                            |      |

35 Lambs  
114 Ewes

|                             |          |   |    |    |    |                            |   |   |   |                                                                                                                                                                 |     |
|-----------------------------|----------|---|----|----|----|----------------------------|---|---|---|-----------------------------------------------------------------------------------------------------------------------------------------------------------------|-----|
| ELISA<br>(crude TZ extract) | TZ ELISA | N | 36 | na | na | 2nd sampling<br>10 m later | - | - | - | High avidity values: 33 animals in both<br>samplings<br>Low avidity values followed by high avidity: 2<br>sera<br>Low avidity values in both samplings: 1 serum | [6] |
|-----------------------------|----------|---|----|----|----|----------------------------|---|---|---|-----------------------------------------------------------------------------------------------------------------------------------------------------------------|-----|

Ref: reference; TZ: Tachyzoite; TC: tissue cysts; Oo: Oocysts; N: Natural infection; E: Experimental infection; w: weeks; m: months; SPF: specific pathogen free; wpi: weeks post-infection; dpi: days post-infection; na: no data available; IFAT: Indirect immunofluorescence antibody test; WB: Western blot

\*\* Strain/ breed

\* IgG seroconversion is usually detected 2–3 weeks p.i., and detectable levels persist for the duration of the experiments. Kinetics of IgM antibodies have been poorly studied in livestock. They were detected early in pigs but had disappeared by two months p.i. [1], whilst in sheep, specific IgM was found for up to three months p.i. [7]. High IgG avidity indices (indicative of a chronic infection) were seen with a tachyzoite lysate-based ELISA starting 8–10 weeks p.i. in pigs [2,3] and with a SAG1-based ELISA starting 8 weeks p.i. in sheep [5]. However, several open questions remain: (i) do low avidity indices persist for several months, as evidenced in other Sarcocystidae infections; (ii) can IgM levels be detected for several months or years, as it occurs in humans [8], and (iii) can above mentioned kinetics of IgM and IgG avidity responses be extrapolated to the situation of natural infections?

## References

1. Lind, P.; Haugegaard, J.; Wingstrand, A.; Henriksen, S.A. The time course of the specific antibody response by various ELISAs in pigs experimentally infected with *Toxoplasma gondii*. *Vet Parasitol* **1997**, *71*, 1-15, doi:10.1016/s0304-4017(97)00010-1.
2. Suárez-Aranda, F.; Galisteo, A.J.; Hiramoto, R.M.; Cardoso, R.P.; Meireles, L.R.; Miguel, O.; Andrade, H.F., Jr. The prevalence and avidity of *Toxoplasma gondii* IgG antibodies in pigs from Brazil and Peru. *Vet Parasitol* **2000**, *91*, 23-32, doi:10.1016/s0304-4017(00)00249-1.
3. Basso, W.; Grimm, F.; Ruetten, M.; Djokic, V.; Blaga, R.; Sidler, X.; Deplazes, P. Experimental *Toxoplasma gondii* infections in pigs: Humoral immune response, estimation of specific IgG avidity and the challenges of reproducing vertical transmission in sows. *Vet Parasitol* **2017**, *236*, 76-85, doi:10.1016/j.vetpar.2017.01.026.
4. Lundén, A. Immune responses in sheep after immunization with *Toxoplasma gondii* antigens incorporated into iscoms. *Vet Parasitol* **1995**, *56*, 23-35, doi:10.1016/0304-4017(94)00670-8.
5. Sager, H.; Gloor, M.; Tenter, A.; Maley, S.; Hässig, M.; Gottstein, B. Immunodiagnosis of primary *Toxoplasma gondii* infection in sheep by the use of a P30 IgG avidity ELISA. *Parasitol Res* **2003**, *91*, 171-174, doi:10.1007/s00436-003-0964-9.
6. Caballero-Ortega, H.; Quiroz-Romero, H.; Olazarán-Jenkins, S.; Correa, D. Frequency of *Toxoplasma gondii* infection in sheep from a tropical zone of Mexico and temporal analysis of the humoral response changes. *Parasitology* **2008**, *135*, 897-902, doi:10.1017/s0031182008004460.
7. Payne, R.A.; Joynton, D.H.; Wilsmore, A.J. Enzyme-linked immunosorbent assays for the measurement of specific antibodies in experimentally induced ovine toxoplasmosis. *Epidemiol Infect* **1988**, *100*, 205-212, doi:10.1017/s0950268800067339.
8. Ybañez, R.H.D.; Ybañez, A.P.; Nishikawa, Y. Review on the current trends of toxoplasmosis serodiagnosis in humans. *Front Cell Infect Microbiol* **2020**, *10*, 204, doi:10.3389/fcimb.2020.00204.
